# Supplementary material for: Central and Effector Memory Human CD4+ and CD8+ T Cells during Cutaneous Leishmaniasis and after In Vitro Stimulation with Leishmania (Viannia) braziliensis Epitopes
Source: MDPI journal article supplement (doi:10.3390/vaccines11010158), 2023-01-11
Supplement: s1 [file s1]

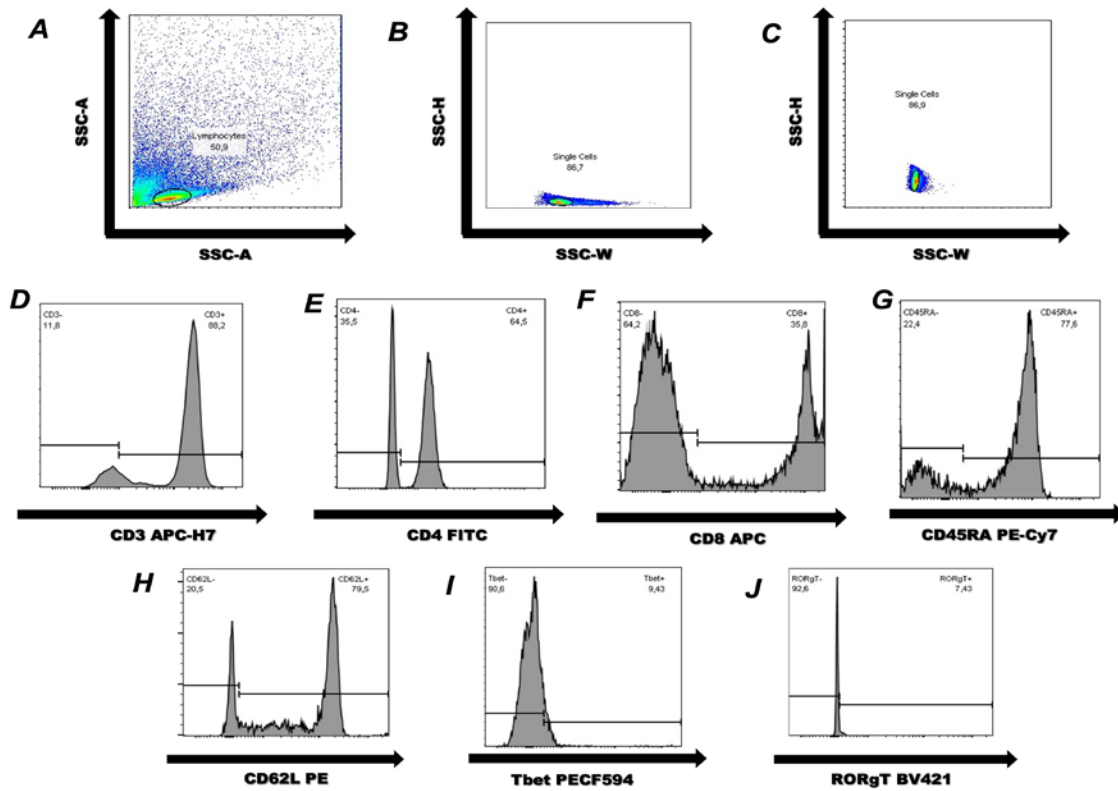

Figure S1. Gating strategy for immunological memory panel.

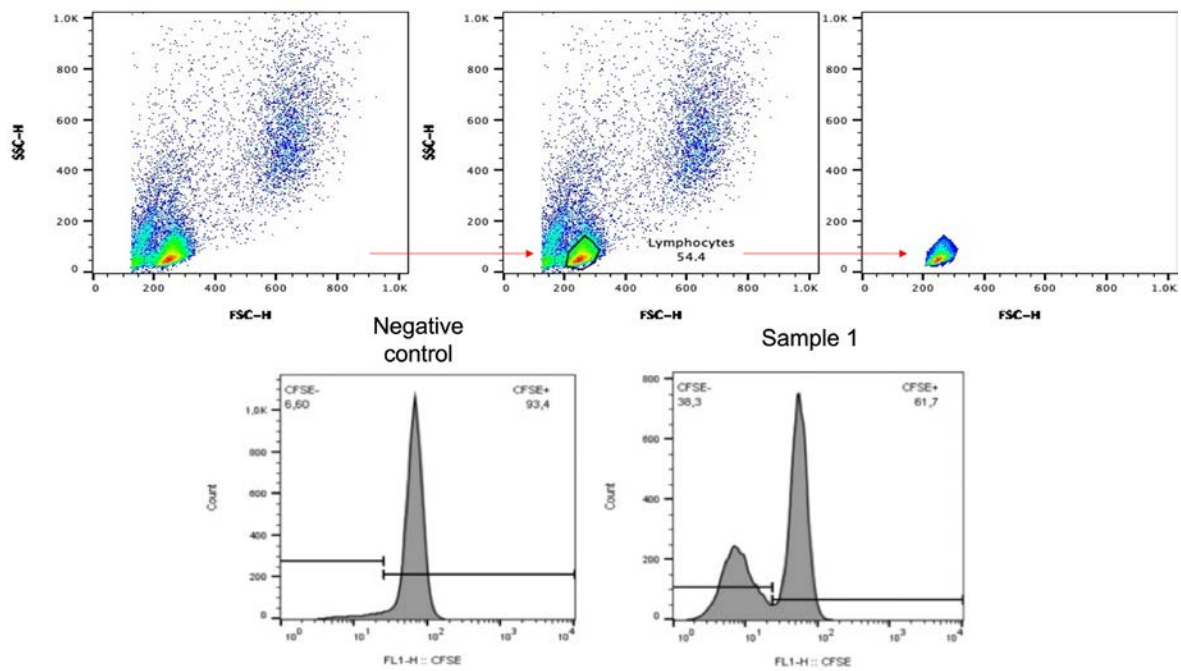

Figure S2. Gating strategy for proliferation assay using CFSE.

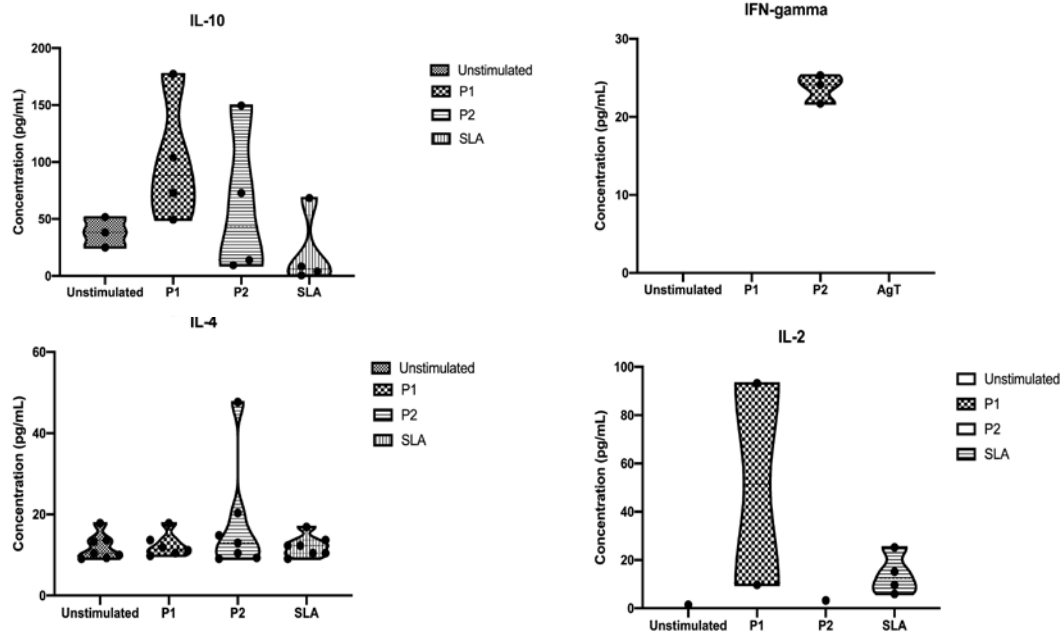

**Figure S3.** Th1 and Th2 cytokine production on CL group after 48h stimulation. P1– pool 1, P2 – pool 2, SLA – Soluble *Leishmania* antigen.

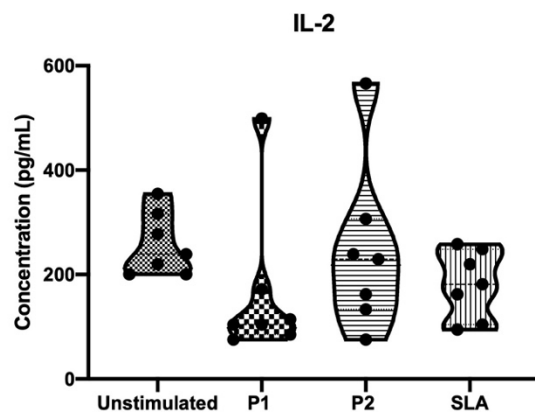

**Figure S4.** Th1 and Th2 cytokine production on CT group after 48h stimulation. P1– pool 1, P2 – pool 2, SLA – Soluble *Leishmania* antigen.
